# Supplementary material for: Genetic, Functional and Molecular Features of Glucocorticoid Receptor Binding
Source: PubMed Central journal article supplement (PMC3640037; doi:10.1371/journal.pone.0061654), 2013-04-30

Table S1. GC interaction eQTLs within 100bp of a GR binding region

| eQTL                  | Gene ID | Posterior probability |         |         |                | Distance from GR binding region | Model        |
|-----------------------|---------|-----------------------|---------|---------|----------------|---------------------------------|--------------|
|                       |         | Control-only          | GC-only | General | No-interaction |                                 |              |
| chr13.indel.112043835 | 122258  | 0.0                   | 0.7     | 0.2     | 0.1            | 0                               | GC-only      |
| chr16.14026269        | 57496   | 0.0                   | 0.7     | 0.3     | 0.0            | 0                               | GC-only      |
| chr16.1819294         | 197342  | 0.0                   | 0.7     | 0.2     | 0.0            | 61                              | GC-only      |
| chr16.1819423         | 197342  | 0.0                   | 0.7     | 0.2     | 0.0            | 0                               | GC-only      |
| chr16.1819495         | 197342  | 0.0                   | 0.7     | 0.2     | 0.0            | 0                               | GC-only      |
| chr16.1819499         | 197342  | 0.0                   | 0.7     | 0.2     | 0.0            | 0                               | GC-only      |
| chr16.1819515         | 197342  | 0.0                   | 0.7     | 0.2     | 0.0            | 4                               | GC-only      |
| chr16.1819516         | 197342  | 0.0                   | 0.7     | 0.2     | 0.0            | 5                               | GC-only      |
| chr16.1819593         | 197342  | 0.0                   | 0.7     | 0.2     | 0.0            | 82                              | GC-only      |
| chr17.indel.68655853  | 9382    | 0.0                   | 0.7     | 0.2     | 0.1            | 25                              | GC-only      |
| chr19.indel.61883135  | 58491   | 0.0                   | 0.8     | 0.2     | 0.1            | 68                              | GC-only      |
| chr4.71017008         | 3347    | 0.0                   | 0.7     | 0.2     | 0.0            | 33                              | GC-only      |
| chr5.150426621        | 10318   | 0.0                   | 0.8     | 0.2     | 0.0            | 0                               | GC-only      |
| chr6.27853698         | 8340    | 0.0                   | 0.7     | 0.1     | 0.1            | 0                               | GC-only      |
| chr6.indel.27853741   | 8340    | 0.0                   | 0.8     | 0.2     | 0.1            | 4                               | GC-only      |
| chr7.indel.19140599   | 7291    | 0.0                   | 0.8     | 0.2     | 0.0            | 0                               | GC-only      |
| chr8.95281620         | 2669    | 0.0                   | 0.7     | 0.2     | 0.0            | 78                              | GC-only      |
| rs1010984             | 26031   | 0.1                   | 0.7     | 0.1     | 0.0            | 84                              | GC-only      |
| rs1077729             | 131583  | 0.1                   | 0.7     | 0.1     | 0.0            | 0                               | GC-only      |
| rs10896077            | 10992   | 0.1                   | 0.7     | 0.2     | 0.0            | 0                               | GC-only      |
| rs2117925             | 10801   | 0.1                   | 0.7     | 0.2     | 0.0            | 0                               | GC-only      |
| rs249820              | 7112    | 0.1                   | 0.7     | 0.1     | 0.0            | 38                              | GC-only      |
| rs2863981             | 9057    | 0.1                   | 0.7     | 0.1     | 0.0            | 87                              | GC-only      |
| rs4646402             | 51655   | 0.0                   | 0.8     | 0.2     | 0.1            | 79                              | GC-only      |
| rs6488551             | 51202   | 0.0                   | 0.8     | 0.1     | 0.0            | 0                               | GC-only      |
| rs7009901             | 401463  | 0.1                   | 0.7     | 0.1     | 0.1            | 72                              | GC-only      |
| rs7533257             | 8548    | 0.1                   | 0.7     | 0.2     | 0.1            | 30                              | GC-only      |
| rs7817921             | 2669    | 0.1                   | 0.7     | 0.2     | 0.0            | 76                              | GC-only      |
| rs7833170             | 2669    | 0.0                   | 0.8     | 0.2     | 0.0            | 82                              | GC-only      |
| rs9302846             | 54715   | 0.0                   | 0.7     | 0.1     | 0.1            | 0                               | GC-only      |
| chr1.232106760        | 148641  | 0.8                   | 0.1     | 0.1     | 0.1            | 47                              | control-only |
| chr1.236113666        | 57829   | 0.7                   | 0.0     | 0.2     | 0.0            | 0                               | control-only |
| chr12.111123075       | 80018   | 0.7                   | 0.1     | 0.2     | 0.0            | 0                               | control-only |
| chr17.34168124        | 8396    | 0.7                   | 0.0     | 0.2     | 0.1            | 77                              | control-only |
| chr17.36944518        | 3868    | 0.7                   | 0.1     | 0.1     | 0.1            | 0                               | control-only |
| chr17.indel.63859855  | 55062   | 0.8                   | 0.0     | 0.2     | 0.0            | 0                               | control-only |
| chr22.36276713        | 11135   | 0.8                   | 0.0     | 0.2     | 0.1            | 0                               | control-only |
| chr4.2735887          | 79155   | 0.7                   | 0.0     | 0.2     | 0.0            | 43                              | control-only |
| chr6.150274651        | 84918   | 0.7                   | 0.0     | 0.2     | 0.1            | 29                              | control-only |
| chr7.indel.141077994  | 54429   | 0.7                   | 0.0     | 0.2     | 0.0            | 1                               | control-only |
| chr8.28011496         | 389643  | 0.7                   | 0.0     | 0.2     | 0.0            | 0                               | control-only |
| chr9.126519571        | 169611  | 0.7                   | 0.1     | 0.2     | 0.0            | 94                              | control-only |
| rs11570449            | 3690    | 0.7                   | 0.0     | 0.2     | 0.0            | 59                              | control-only |
| rs12034326            | 10712   | 0.7                   | 0.1     | 0.1     | 0.1            | 37                              | control-only |
| rs12255505            | 118490  | 0.7                   | 0.0     | 0.1     | 0.1            | 41                              | control-only |
| rs7808626             | 10842   | 0.7                   | 0.0     | 0.2     | 0.1            | 0                               | control-only |

Table S2. GC interaction eQTLs within 1Kb of a NF- $\kappa$ B binding region

| eQTL           | Gene ID | Posterior probability |         |         |                | Distance from NF $\kappa$ B binding region | Model        |
|----------------|---------|-----------------------|---------|---------|----------------|--------------------------------------------|--------------|
|                |         | Control-only          | GC-only | General | No-interaction |                                            |              |
| chr17.19328263 | 55244   | 0.0                   | 0.8     | 0.2     | 0.0            | 880                                        | GC-only      |
| rs9611465      | 2033    | 0.1                   | 0.7     | 0.2     | 0.0            | 309                                        | GC-only      |
| rs9611466      | 2033    | 0.1                   | 0.7     | 0.2     | 0.0            | 469                                        | GC-only      |
| chr11.60467827 | 54972   | 0.7                   | 0.0     | 0.2     | 0.1            | 648                                        | control-only |
| chr15.43542220 | 283651  | 0.7                   | 0.0     | 0.2     | 0.0            | 604                                        | control-only |
| chr21.42125905 | 54101   | 0.7                   | 0.1     | 0.2     | 0.0            | 0                                          | control-only |
| chr6.121476451 | 221322  | 0.7                   | 0.0     | 0.2     | 0.0            | 82                                         | control-only |
| rs5018397      | 54101   | 0.7                   | 0.1     | 0.1     | 0.1            | 886                                        | control-only |
| rs7696043      | 92597   | 0.8                   | 0.0     | 0.1     | 0.1            | 343                                        | control-only |
| rs7756653      | 221322  | 0.7                   | 0.0     | 0.2     | 0.0            | 58                                         | control-only |

Figure S1. GR binding profiles near differentially expressed genes in the absence of GC (control) and, for these same sites, in the presence of GC. Color intensity is proportional to the number of sequence reads in 2Kb windows centered on the peak of each binding region. Each row corresponds to a different binding region. Regions are sorted by decreasing p-values.

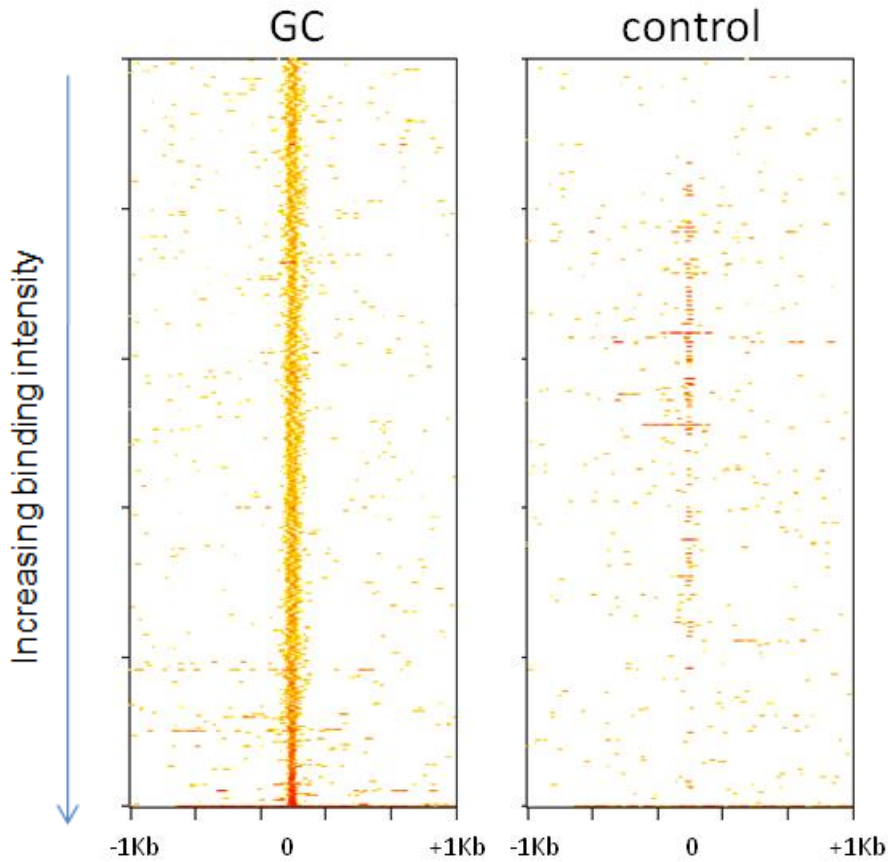

Figure S2. Distribution of GR binding sites relative to the TSS of differentially expressed genes. GR binding events upstream of up-regulated genes (A) tend to be closer to the TSS, compared to down-regulated genes (B).

A

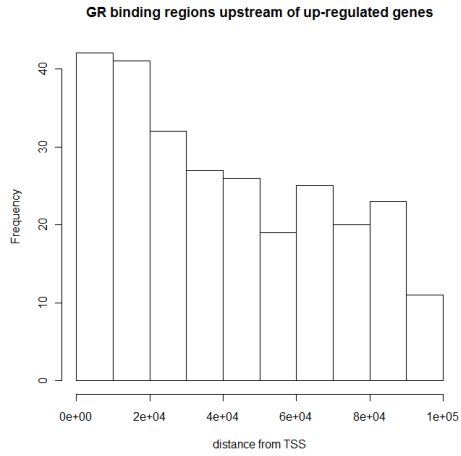

B

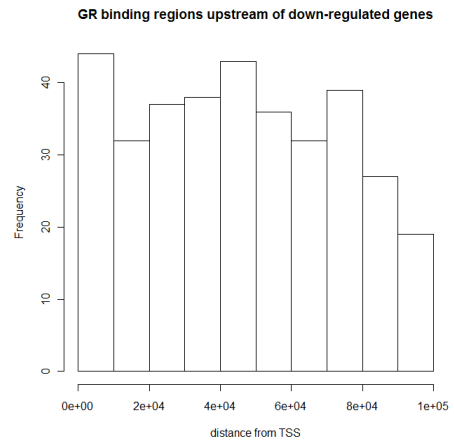

Figure S3. Heat maps of differentially expressed genes over a 24hrs GC treatment time course (left panels). Genes are sorted according to the cluster they fall in. Clusters have been identified by k-means clustering for  $1 < k < 20$ . The right panels represent the temporal profiles for the centers of each of the k clusters of differentially expressed genes.

k=1

Mean log fold change by cluster

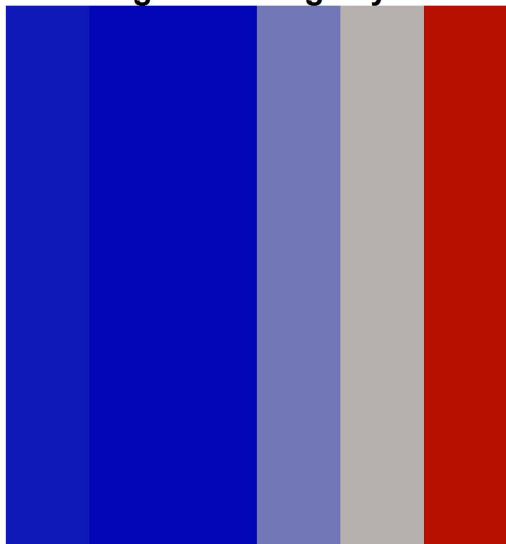

Log fold change at each gene

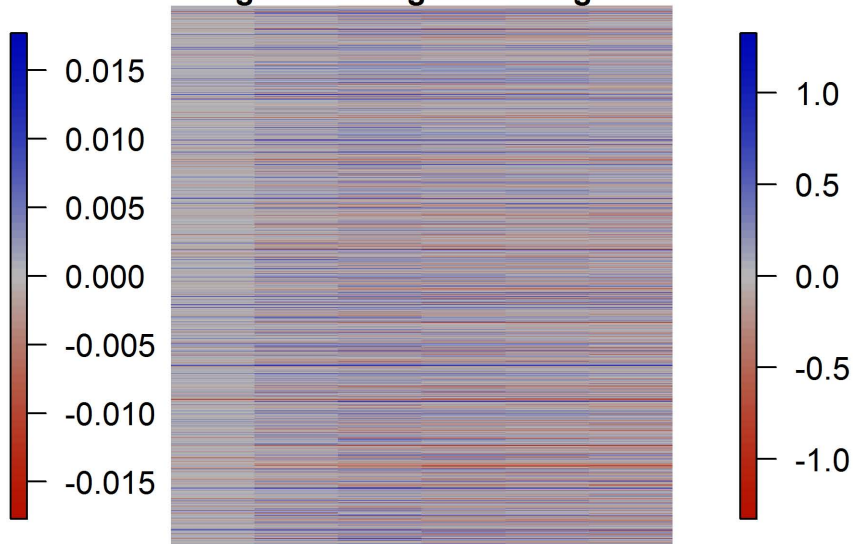

k=2

Mean log fold change by cluster

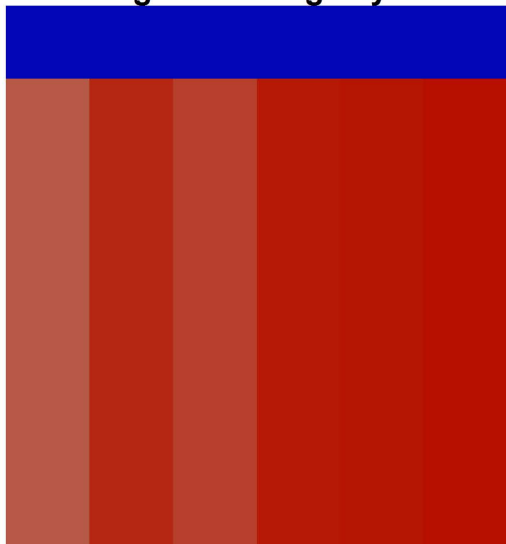

Log fold change at each gene

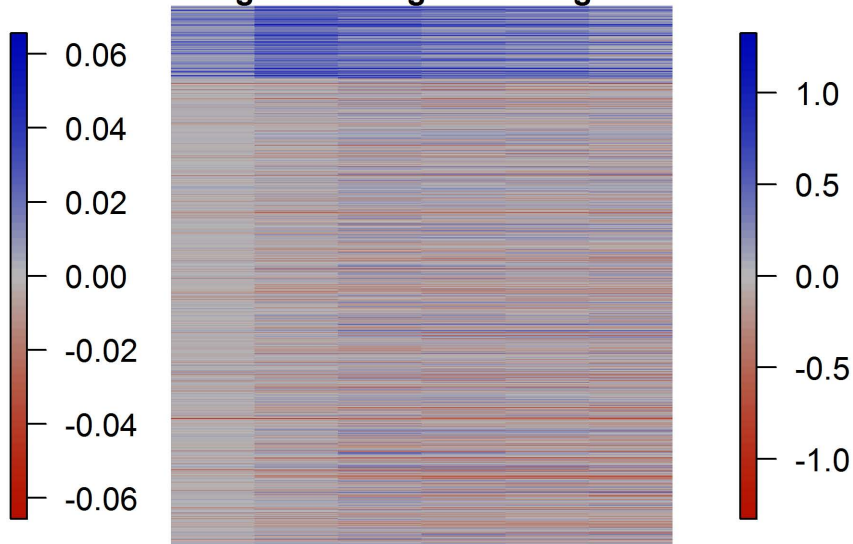

k=3

Mean log fold change by cluster

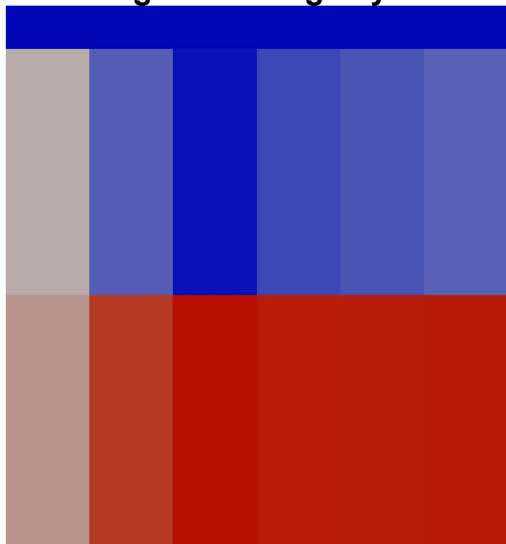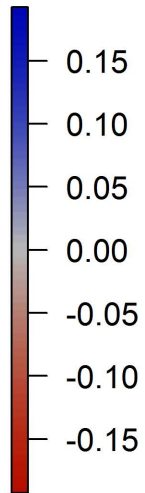

Log fold change at each gene

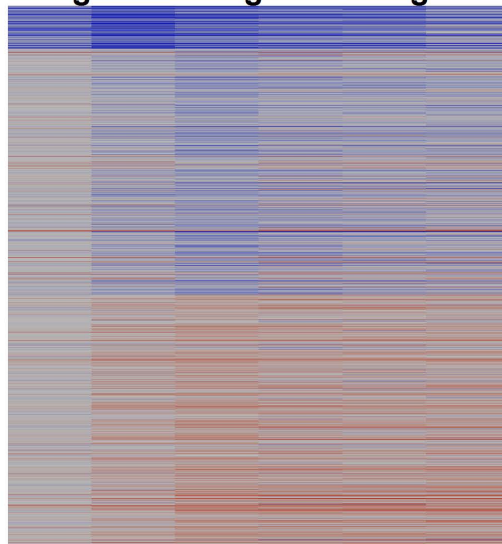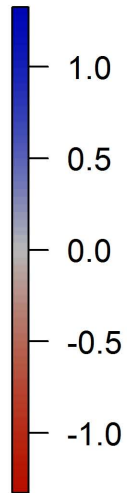



k=4

Mean log fold change by cluster

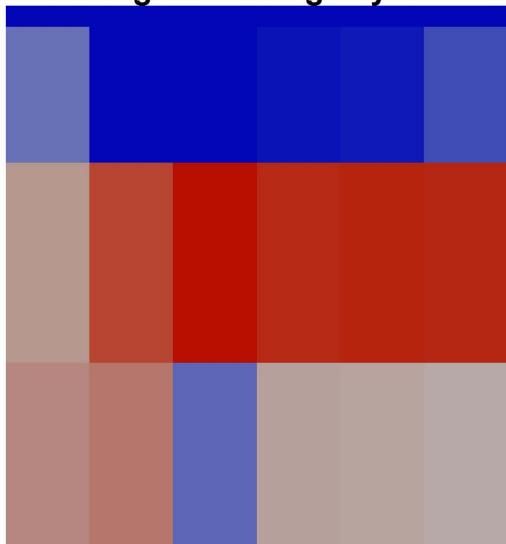

Log fold change at each gene

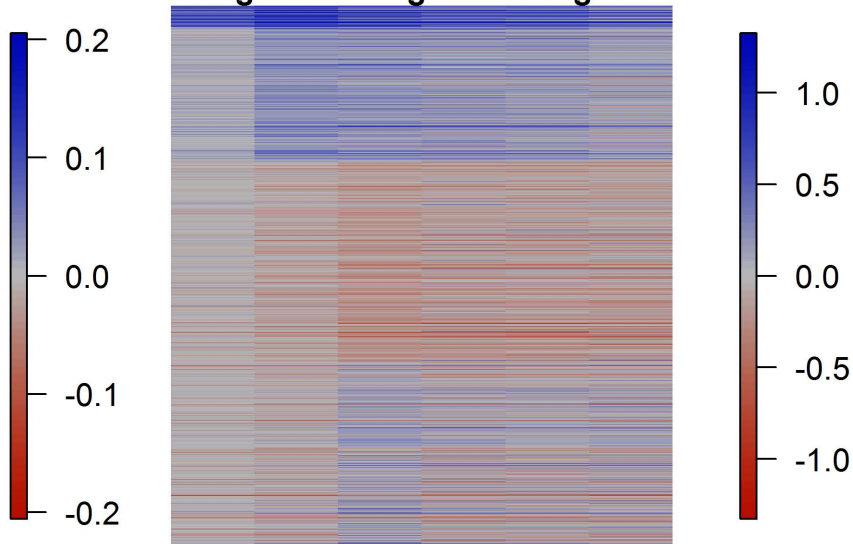

k=5

Mean log fold change by cluster

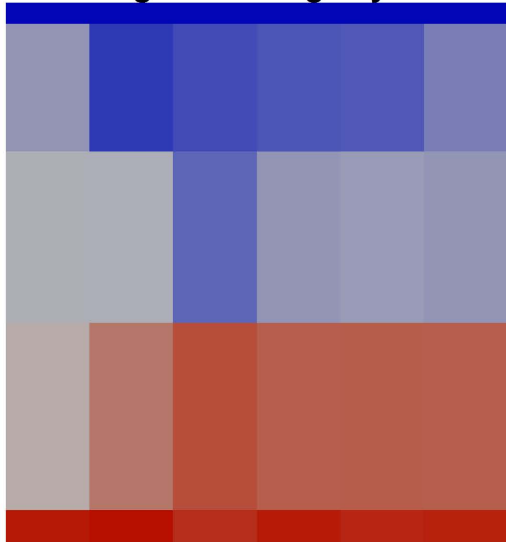

Log fold change at each gene

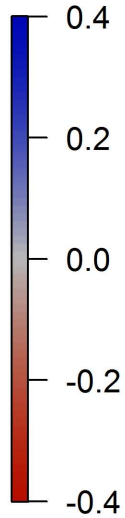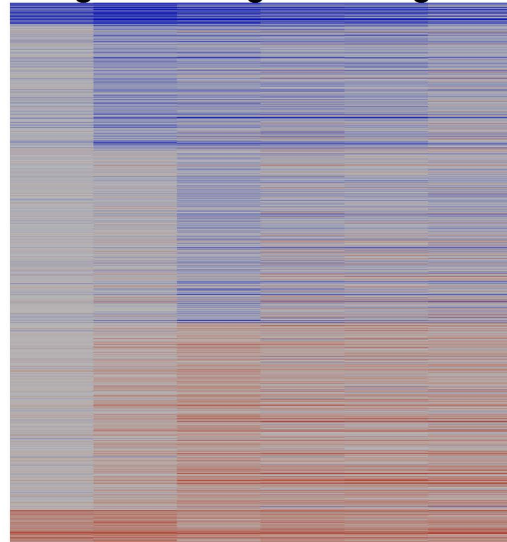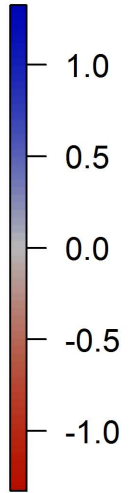

k=6

Mean log fold change by cluster

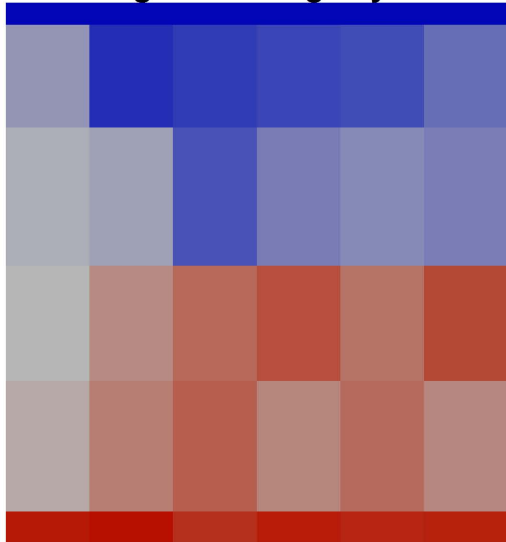

Log fold change at each gene

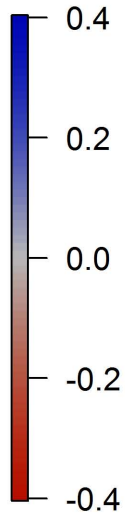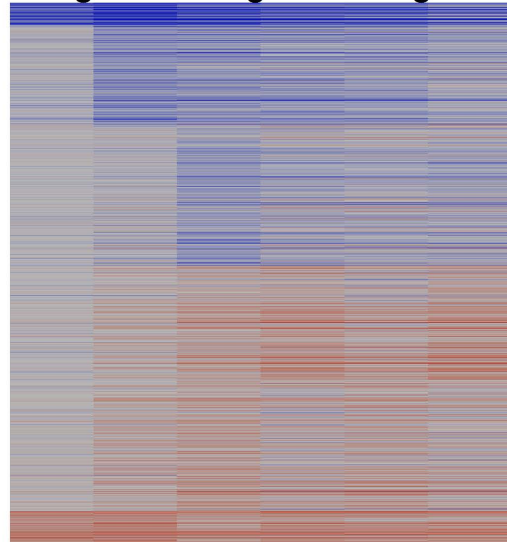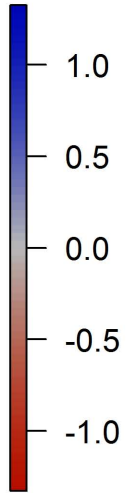

k=7

Mean log fold change by cluster

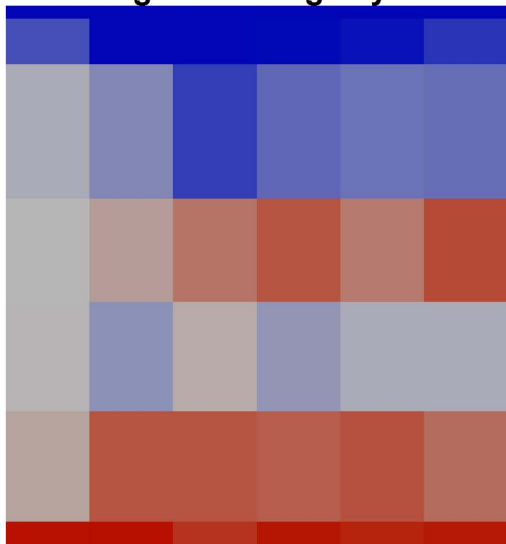

Log fold change at each gene

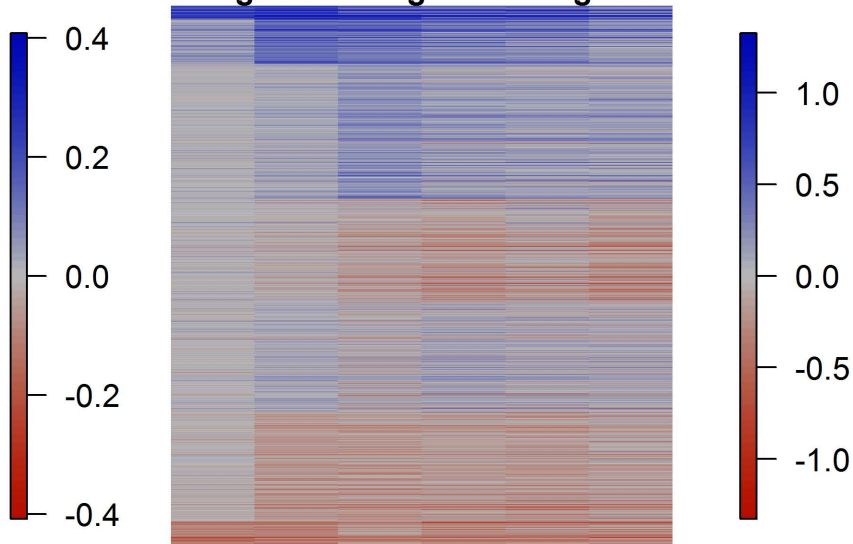

k=8

Mean log fold change by cluster

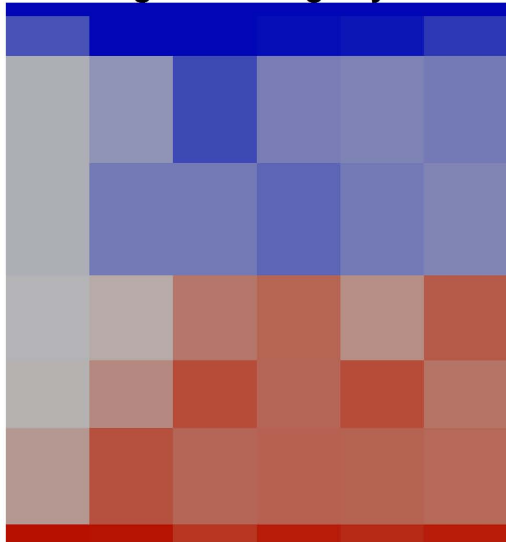

Log fold change at each gene

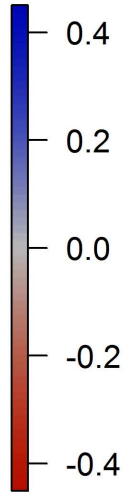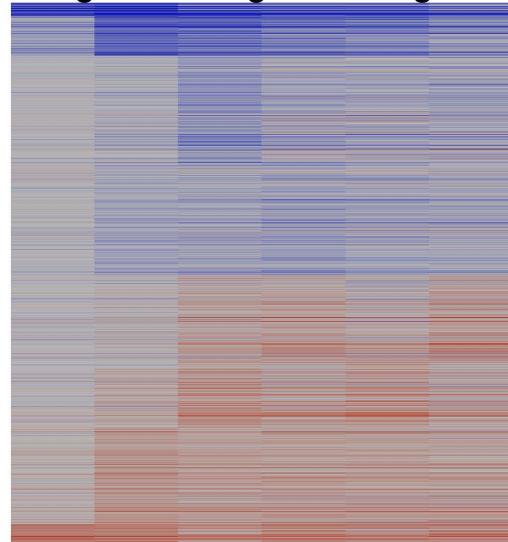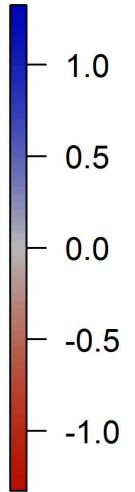

k=9

Mean log fold change by cluster

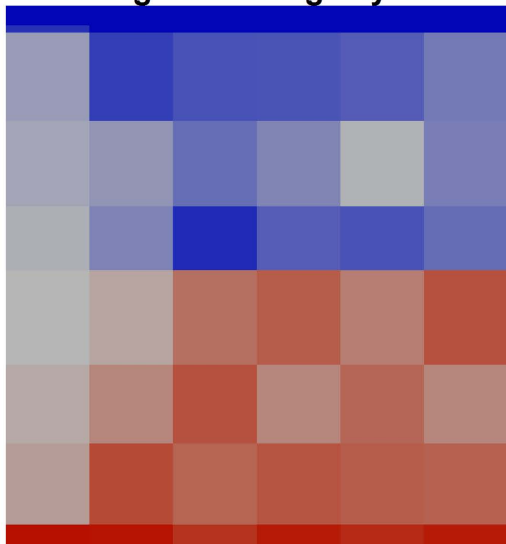

Log fold change at each gene

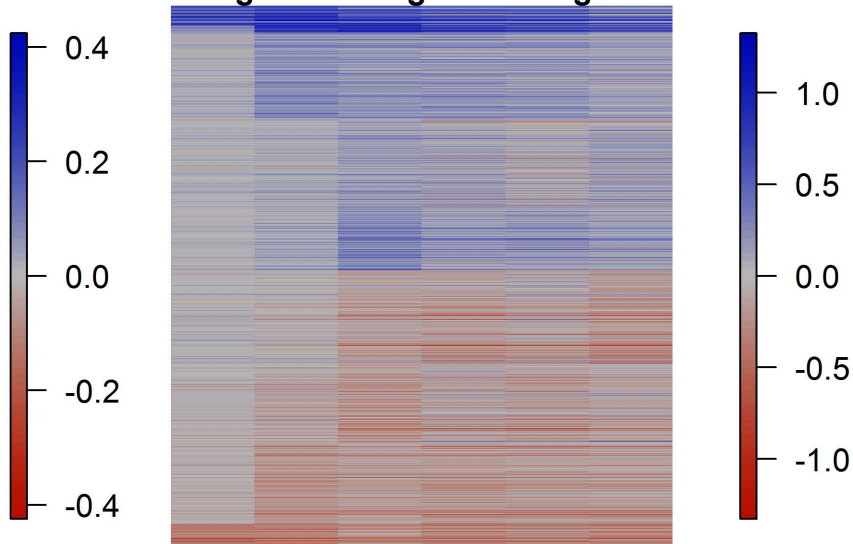

k=10

Mean log fold change by cluster

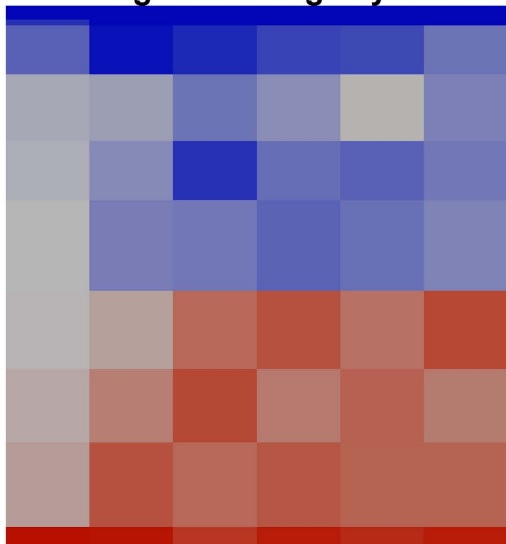

Log fold change at each gene

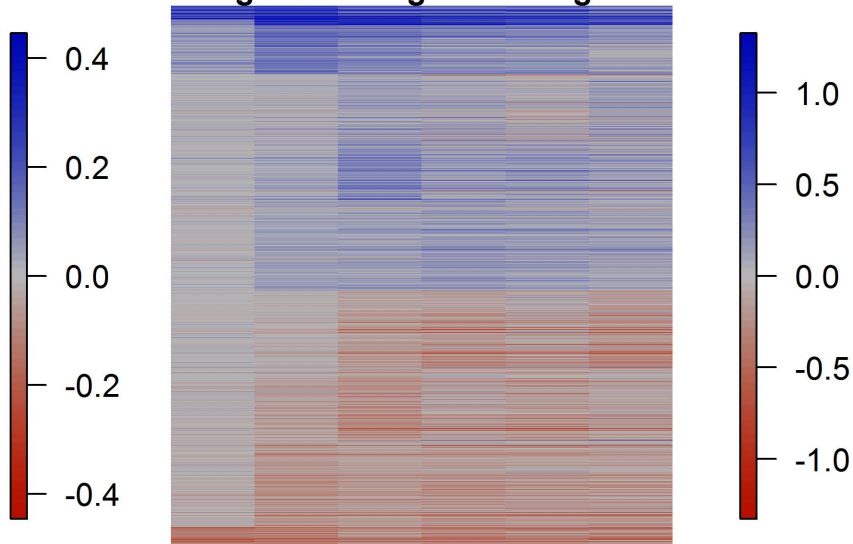

k=11

Mean log fold change by cluster

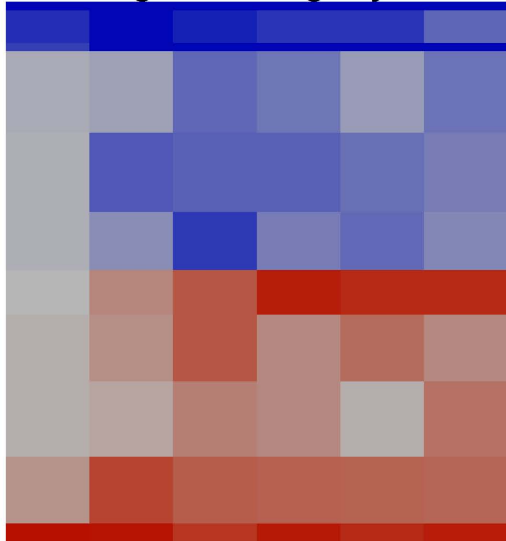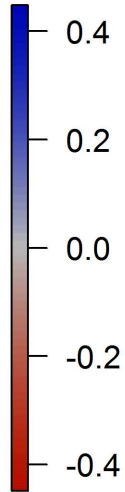

Log fold change at each gene

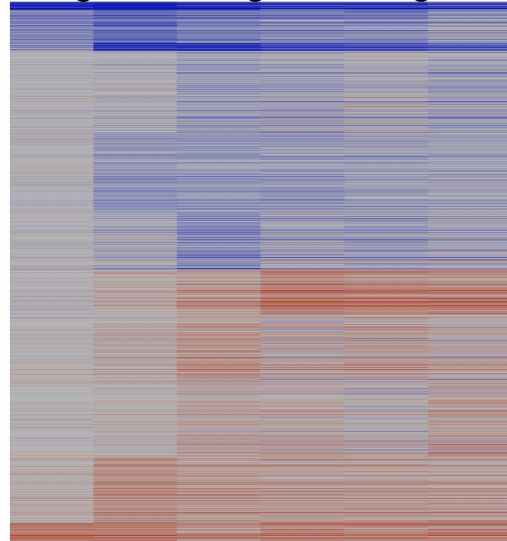



k=12

Mean log fold change by cluster

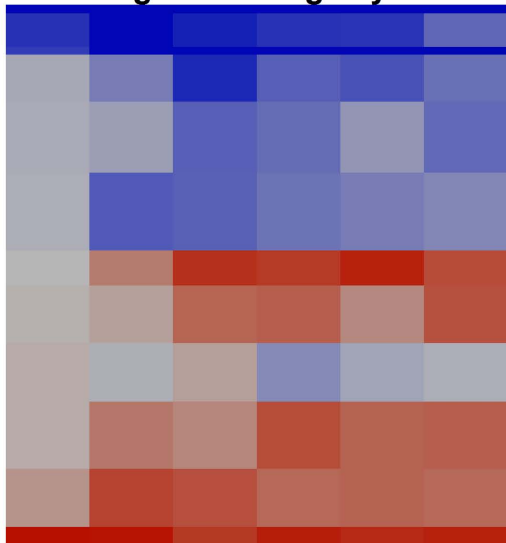

Log fold change at each gene

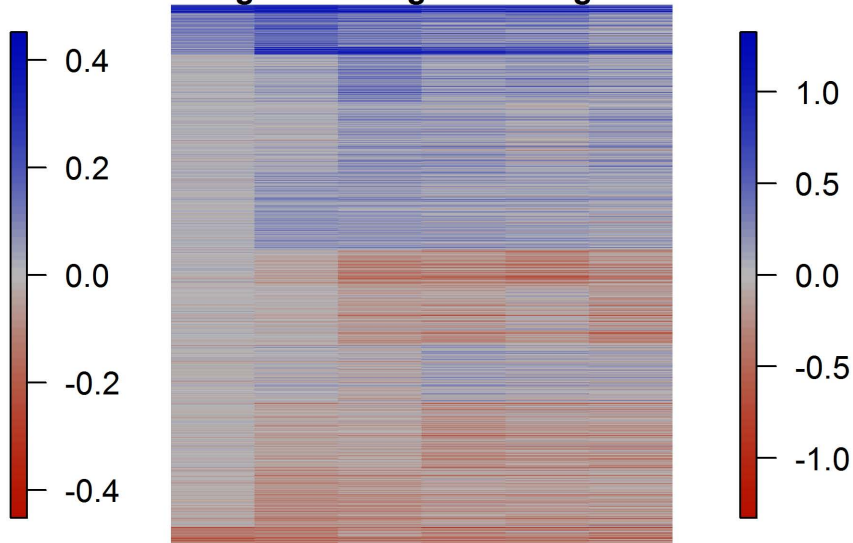

k=13

Mean log fold change by cluster

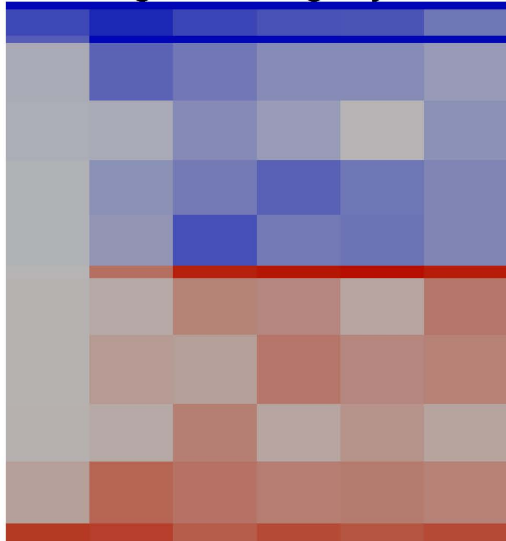

Log fold change at each gene

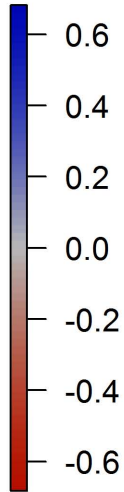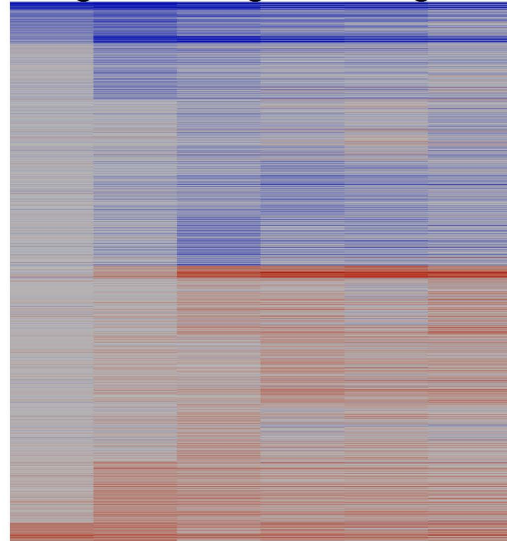

k=14

Mean log fold change by cluster

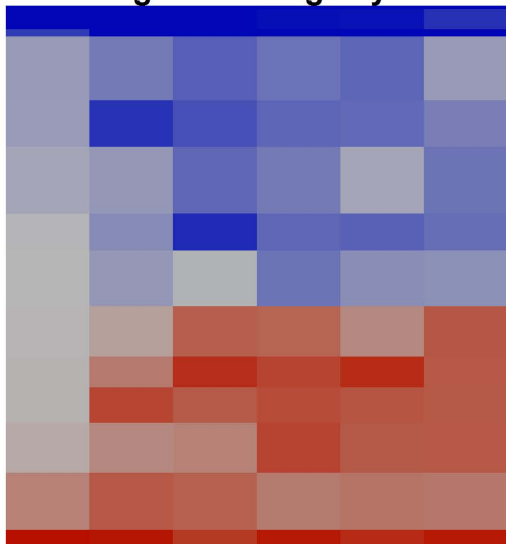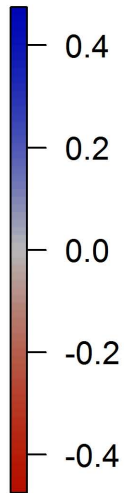

Log fold change at each gene

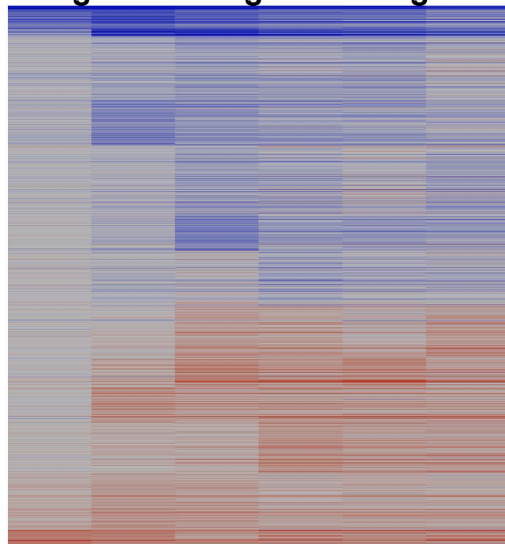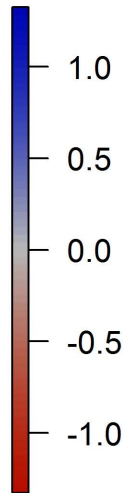

k=15

Mean log fold change by cluster

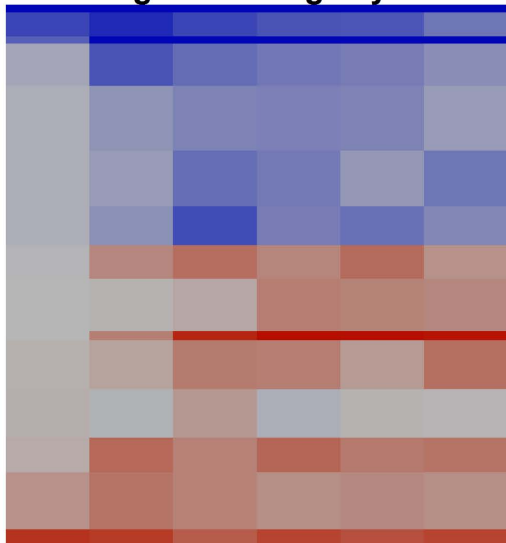

Log fold change at each gene

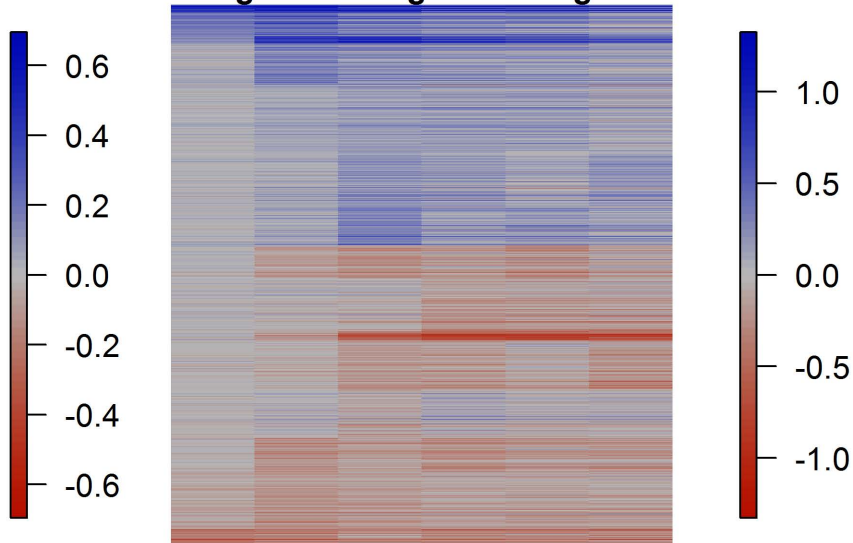

k=16

Mean log fold change by cluster

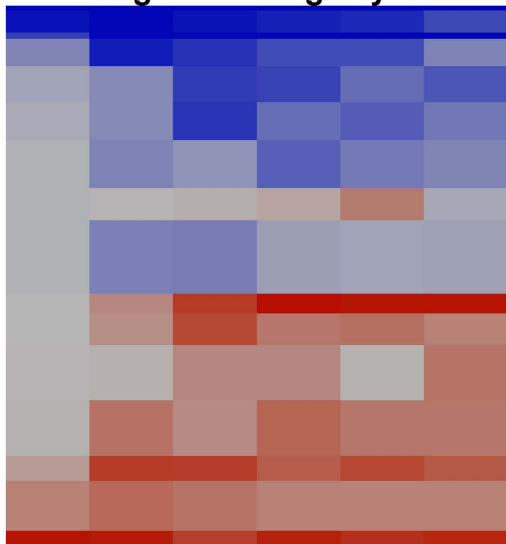

Log fold change at each gene

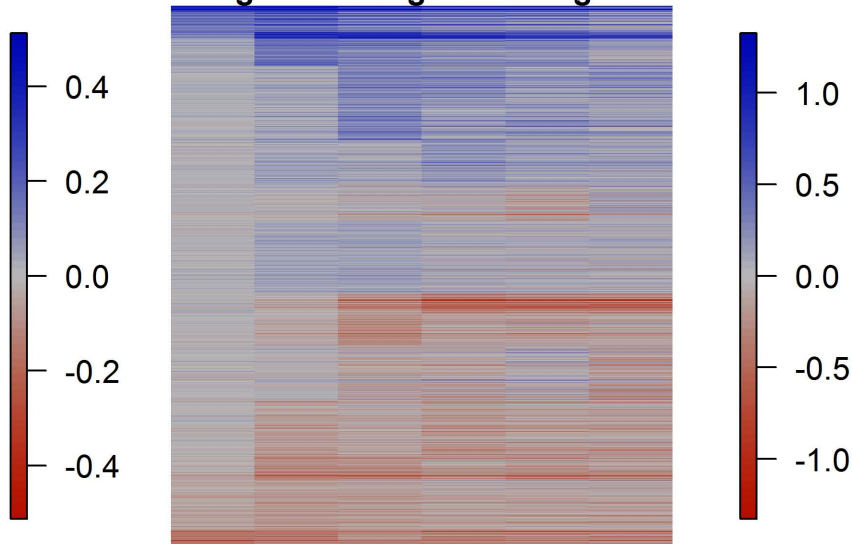

k=17

Mean log fold change by cluster

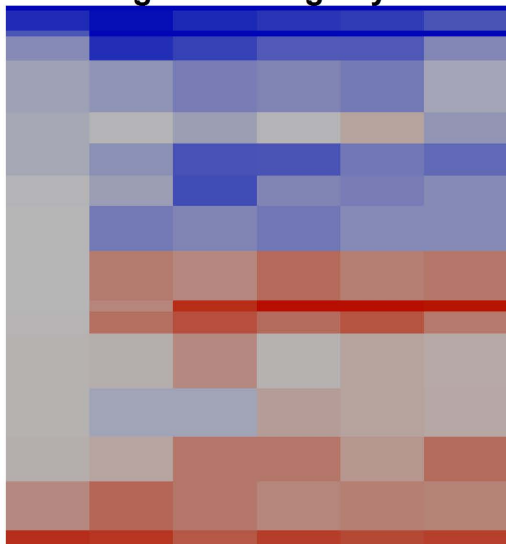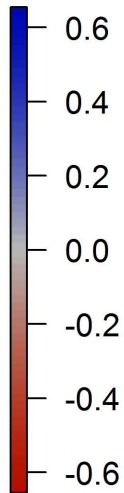

Log fold change at each gene

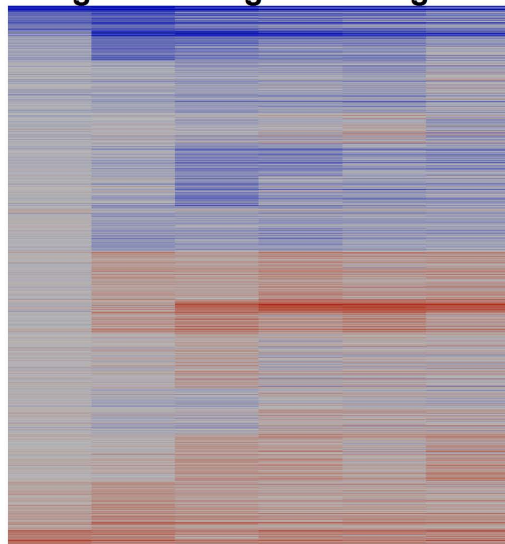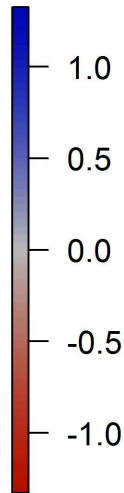

# k=18

## Mean log fold change by cluster

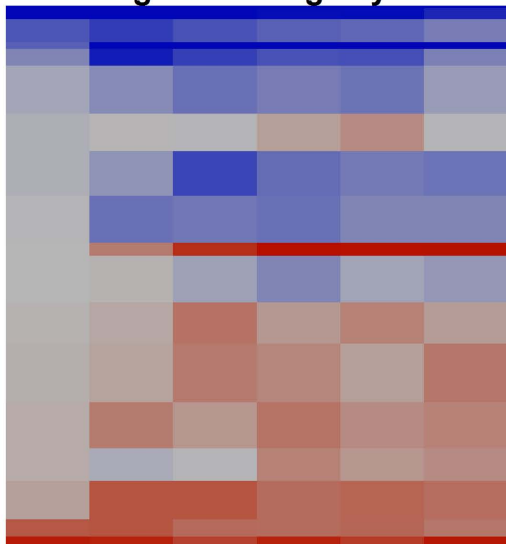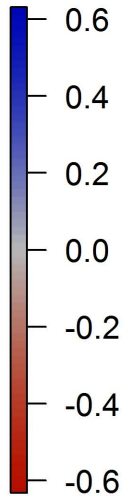

## Log fold change at each gene

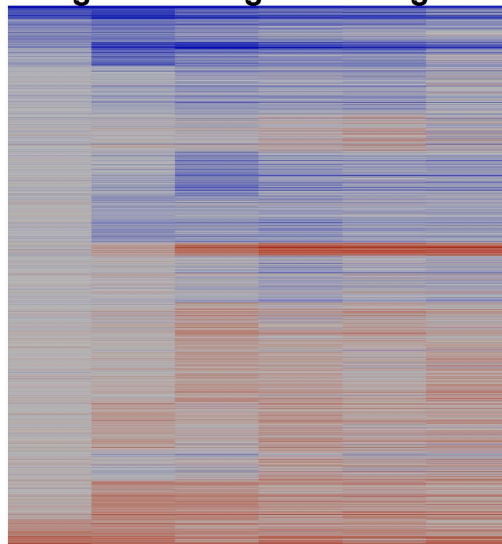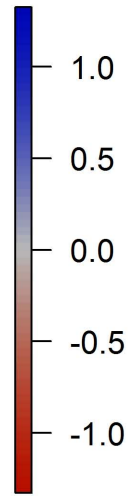

# k=19

## Mean log fold change by cluster

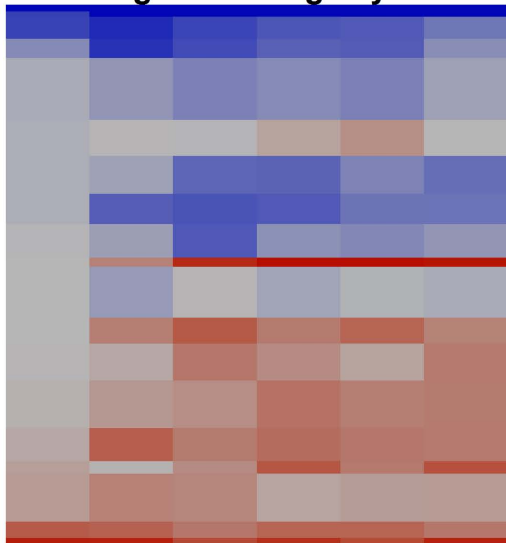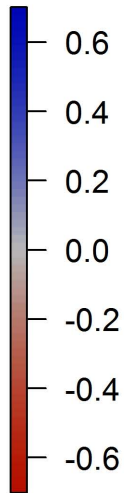

## Log fold change at each gene

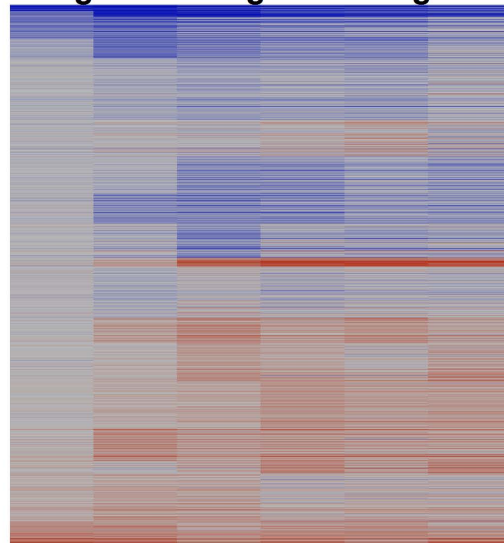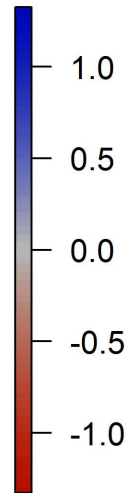



k=20

Mean log fold change by cluster

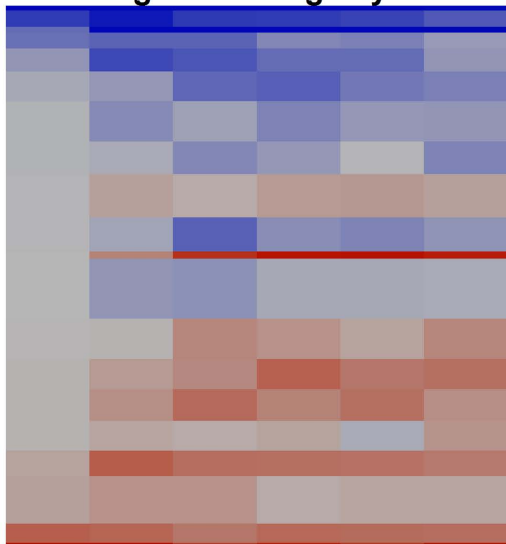

Log fold change at each gene

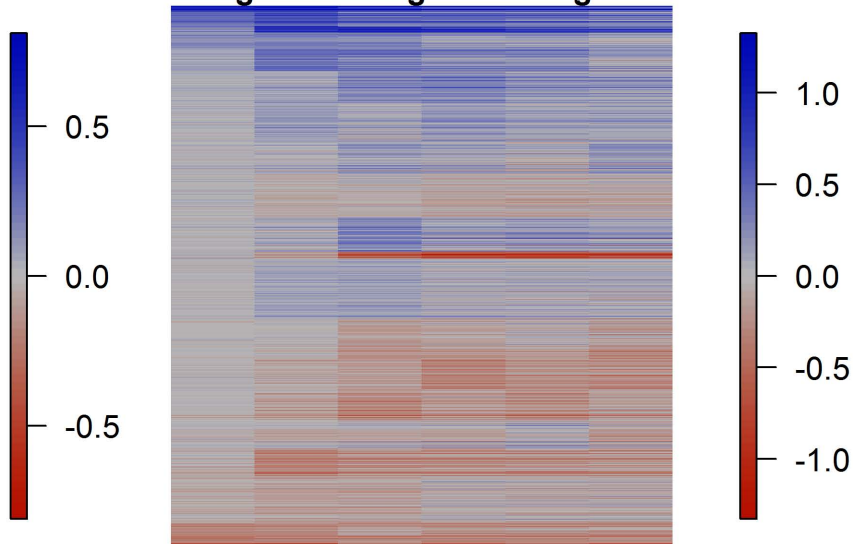

Supplement: pone.0061654.s001.pdf [file pone.0061654.s001.pdf]
